# Supplementary material for: National Trends in Physical Activity Among Adults in South Korea Before and During the COVID-19 Pandemic, 2009-2021
Source: PubMed Central journal article supplement (PMC10242425; doi:10.1001/jamanetworkopen.2023.16930), 2023-06-05
Supplement: jamanetwopen-e2316930-s001.pdf [file jamanetwopen-e2316930-s001.pdf]

## Supplemental Online Content

Park S, Kim HJ, Kim S, et al. National trends in physical activity among adults in South Korea before and during the COVID-19 pandemic, 2009-2021. *JAMA Netw Open*. 2023;6(6):e2316930. doi:10.1001/jamanetworkopen.2023.16930

**eFigure 1.** Linear and Nonlinear Trends of Physical Activity for All Time Periods

**eFigure 2.** Rate of Change in Prevalence of Physical Activity Before and After COVID-19 Pandemic Onset

**eTable.** Results of a Systematic Rapid Review Reporting Trends of Physical Activity in Study Periods

This supplemental material has been provided by the authors to give readers additional information about their work.

1 **eFigure 1. Linear and Nonlinear Trends of Physical Activity for All Time Periods**

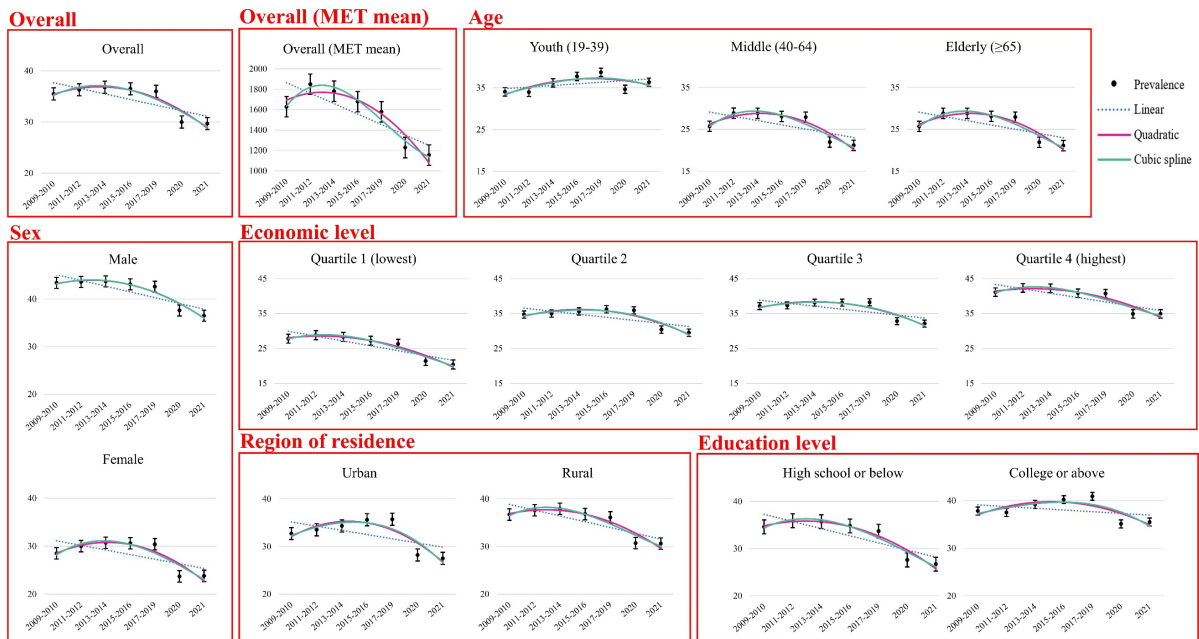

2

3 Abbreviations: MET, metabolic equivalent of task.

4

5 **eFigure 2. Rate of Change in Prevalence of Physical Activity Before and After COVID-19**  
6 Pandemic Onset

|                            |                      | Before                 |                        |                        |                        | Intermediate      | After        | Physical activity trend, $\beta$ |                |                  |
|----------------------------|----------------------|------------------------|------------------------|------------------------|------------------------|-------------------|--------------|----------------------------------|----------------|------------------|
|                            |                      | 2009–2010 to 2011–2012 | 2011–2012 to 2013–2014 | 2013–2014 to 2015–2016 | 2015–2016 to 2017–2019 | 2017–2019 to 2020 | 2020 to 2021 | Before pandemic                  | After pandemic | Trend difference |
|                            | Overall              | 2.25                   | 1.38                   | -0.82                  | -1.37                  | -16.67            | -1.00        | 1.0                              | -10.6          | -11.6            |
| Age, year                  | 19–29                | 3.54                   | 8.55                   | 2.89                   | 2.30                   | -8.73             | 6.83         | 14.3                             | -2.2           | -16.6            |
|                            | 30–39                | -2.93                  | 5.14                   | 5.17                   | 2.46                   | -13.07            | 3.37         | 8.5                              | -6.5           | -15.0            |
|                            | 40–49                | -2.42                  | 0.25                   | 0.00                   | -1.48                  | -15.79            | -0.89        | -2.3                             | -10.7          | -8.4             |
|                            | 50–64                | 3.23                   | -0.96                  | -2.91                  | -0.75                  | -16.37            | -4.22        | -2.4                             | -12.6          | -10.2            |
|                            | ≥ 65                 | 12.06                  | 0.00                   | -2.43                  | -0.71                  | -21.51            | -3.65        | 3.1                              | -13.4          | -16.4            |
| Sex                        | Male                 | 0.46                   | 0.23                   | -1.37                  | -1.16                  | -11.74            | -2.93        | -1.6                             | -9.3           | -7.7             |
|                            | Female               | 5.26                   | 2.33                   | -0.33                  | -0.65                  | -22.04            | 0.42         | 4.3                              | -12.5          | -16.8            |
| BMI, kg/m <sup>2</sup>     | Underweight          | 9.42                   | 4.51                   | -1.18                  | 0.40                   | -17.79            | 0.00         | 7.5                              | -9.7           | -17.1            |
|                            | Normal               | 2.64                   | 1.43                   | -0.85                  | -1.14                  | -17.82            | -0.70        | 1.5                              | -11.1          | -12.5            |
|                            | Overweight           | 1.29                   | 0.76                   | -2.27                  | -1.29                  | -15.18            | -4.63        | -1.6                             | -11.7          | -10.0            |
|                            | Obese                | 1.58                   | 0.52                   | -0.52                  | -3.63                  | -16.67            | 1.94         | -1.6                             | -9.5           | -7.9             |
| Region of residence        | Urban                | 2.45                   | 2.39                   | 3.79                   | 0.28                   | -21.01            | -2.48        | 7.2                              | -14.1          | -21.2            |
|                            | Rural                | 2.45                   | 0.80                   | -2.90                  | -1.90                  | -14.96            | -0.33        | -1.7                             | -9.2           | -7.5             |
| Educational level          | High school or below | 3.76                   | -0.56                  | -2.52                  | -3.16                  | -18.10            | -3.26        | -2.5                             | -12.1          | -9.6             |
|                            | College or above     | -0.79                  | 4.53                   | 2.55                   | 1.74                   | -14.18            | 1.14         | 7.5                              | -8.9           | -16.3            |
| Economic level             | Quartile 1 (lowest)  | 3.60                   | -1.74                  | -3.89                  | -3.31                  | -18.63            | -4.67        | -4.7                             | -11.8          | -7.0             |
|                            | Quartile 2           | 0.86                   | 1.71                   | 1.69                   | -0.83                  | -15.32            | -2.96        | 3.2                              | -10.5          | -13.7            |
|                            | Quartile 3           | 0.54                   | 2.14                   | 0.00                   | 0.26                   | -14.14            | -2.13        | 2.3                              | -9.6           | -11.9            |
|                            | Quartile 4 (highest) | 2.92                   | -0.24                  | -3.32                  | -0.25                  | -14.25            | 0.00         | -2.1                             | -9.3           | -7.2             |
| Smoking                    | Current smoker       | 1.22                   | 0.48                   | -1.68                  | -1.95                  | -10.45            | -4.17        | -1.4                             | -8.8           | -7.3             |
|                            | Ex-smoker            | 0.47                   | -0.24                  | -1.89                  | -1.20                  | -12.41            | -3.06        | -2.8                             | -9.7           | -6.9             |
|                            | Never smoked         | 3.46                   | 2.13                   | -0.30                  | -0.90                  | -19.28            | 0.37         | 3.0                              | -11.3          | -14.3            |
| Alcohol intake, days/month | < 1                  | 4.03                   | 0.97                   | -1.92                  | -0.33                  | -17.65            | -1.59        | 1.1                              | -10.8          | -11.9            |
|                            | 1–4                  | 0.52                   | 2.58                   | 0.25                   | 0.50                   | -12.50            | 1.43         | 3.4                              | -7.2           | -10.6            |
|                            | ≥ 5                  | 0.68                   | -1.12                  | -1.14                  | -2.07                  | -12.68            | -2.15        | -3.4                             | -9.4           | -6.0             |
| Diabetes                   | Yes                  | 6.38                   | -0.95                  | -3.82                  | -0.33                  | -19.93            | -2.90        | -1.3                             | -12.7          | -11.4            |
|                            | No                   | 2.23                   | 1.63                   | -0.54                  | -1.08                  | -16.08            | -0.97        | 1.7                              | -10.3          | -12.0            |
| Hypertension               | Yes                  | 6.13                   | 0.91                   | -3.01                  | -3.42                  | -18.97            | -2.78        | -1.1                             | -12.1          | -11.0            |
|                            | No                   | 1.91                   | 1.34                   | 0.26                   | -0.26                  | -15.61            | -0.63        | 2.6                              | -10.1          | -12.7            |
| Depression                 | Yes                  | 4.05                   | 0.32                   | 3.88                   | -4.05                  | -14.61            | -4.18        | 3.2                              | -10.5          | -13.7            |
|                            | No                   | 2.54                   | 1.10                   | -0.82                  | -1.37                  | -16.67            | -1.00        | 1.0                              | -10.6          | -11.6            |
| Stress status              | Yes                  | 6.39                   | -1.50                  | 3.96                   | -1.47                  | -13.39            | 0.00         | 4.5                              | -7.9           | -12.4            |
|                            | No                   | 2.54                   | 1.10                   | -0.82                  | -1.37                  | -16.67            | -1.00        | 0.9                              | -10.7          | -11.6            |

7

8 Abbreviations: BMI, body mass index.

9

10 **eTable.** Results of a Systematic Rapid Review Reporting Trends of Physical Activity in Study Periods

| Author, year                     | Country                | Samples | Subject (age; years)                | Design | Collection type       | Study period     | Result                                                                                                                                                                                                         | PA |
|----------------------------------|------------------------|---------|-------------------------------------|--------|-----------------------|------------------|----------------------------------------------------------------------------------------------------------------------------------------------------------------------------------------------------------------|----|
| <b>Include COVID-19 pandemic</b> |                        |         |                                     |        |                       |                  |                                                                                                                                                                                                                |    |
| Ajčević et al, 2021              | Italy                  | 400     | Adult (>18)                         | C-S    | Survey                | 2020.01–2020.03  | During the lockdown, the number of steps dropped.                                                                                                                                                              | ▼  |
| Al-Musharaf et al, 2021          | Saudi Arabia           | 297     | Female (19-30)                      | C-S    | Questionnaire         | 2019–2020        | Since COVID-19, there has been an increase in weight related to increased actual total sleeping hours, decreased physical activity and coffee consumption.                                                     | ▼  |
| Cheval et al, 2021               | France and Switzerland | 377     | Adult (mean age, 40)                | C-S    | Questionnaire, survey | 2020.03–2020.04  | With lockdown, more time was spent on walking and moderate physical activity. However, there were also adverse effects such as a decrease in vigorous physical activity and an increase in sedentary behavior. | –  |
| Di Sebastiano et al, 2020        | Canada                 | 2,338   | Adult (≥18)                         | C-S    | App                   | 2020.02–2020.04  | MVPA and LPA significantly declined following the pandemic. Significant and sustained declines in LPA were observed even after 6 weeks of pandemic declaration.                                                | ▼  |
| Ding et al, 2021                 | China                  | 815     | Adult (>18)                         | C-S    | App                   | 2019–2020        | Step counts dropped sharply immediately after COVID-19 lockdowns, but soon began to increase. However, PA continues to decline due to COVID-19 lockdowns.                                                      | ▼  |
| Richardson et al, 2021           | UK                     | 117     | Older adult (mean age, 76)          | C-S    | Survey                | 2020.03– 2020.05 | Maintaining the level of PA before the lockdown after COVID-19.                                                                                                                                                | –  |
| Romero-Blanco et al, 2020        | Spain                  | 213     | University student (mean age, 20.5) | C-S    | Questionnaire         | 2020.01–2020.04  | Since COVID-19, the PA and sedentary lifestyle of the participants has increased.                                                                                                                              | ▲  |
| Suzuki et al, 2020               | Japan                  | 165     | Older adult (≥65)                   | C-S    | Questionnaire         | 2017–2020        | This study found that public health restrictions during the COVID-19 pandemic had a significant impact on the PA levels and subjective well-being of elderly individuals.                                      | ▼  |
| To et al, 2021                   | Australia              | 60,560  | Adult (18-79)                       | C-S    | Program               | 2018–2020        | There has been a decline in PA since the start of the COVID-19 lockdown, but it is quickly recovering.                                                                                                         | ▼  |
| <b>Before COVID-19 pandemic</b>  |                        |         |                                     |        |                       |                  |                                                                                                                                                                                                                |    |

|                      |                        |         |                                                                |     |               |           |                                                                                                                                                                                                           |   |
|----------------------|------------------------|---------|----------------------------------------------------------------|-----|---------------|-----------|-----------------------------------------------------------------------------------------------------------------------------------------------------------------------------------------------------------|---|
| Biernat et al, 2019  | Poland                 | 7,347   | Adult (15-69)                                                  | C-S | Survey        | 2014–2018 | Participation in LTPA and prevalence of recommended PA ( $\geq 600$ MET-min/weeks) continued to increase. However, it is lower than in other Central and Eastern European countries.                      | ▲ |
| Du et al, 2019       | US                     | 27,343  | Adult ( $\geq 18$ )                                            | C-S | Survey        | 2007–2016 | Adherence rates of the PAG did not improve over the study period, but sedentary time increased significantly over time.                                                                                   | ▼ |
| Guthold et al, 2018  | Global (168 countries) | 1.9M    | Adult ( $\geq 18$ )                                            | C-S | Questionnaire | 2001–2016 | Between 2001 and 2016, levels of insufficient PA were stable and over time, their prevalence increased in high-income countries than in low-income countries.                                             | – |
| Griffin et al, 2020  | Australia              | 107,171 | Adult (18-75)                                                  | C-S | Survey        | 2004–2018 | PA levels have increased since 2004, but there is considerable variation by employment status, with employed and inactive adults showing significant increases and unemployed adults showing no increase. | ▲ |
| Martins et al, 2019  | Portuguese             | 9,856   | Adolescent (11-17)                                             | C-S | Survey        | 2002–2014 | The prevalence of Portuguese girls meeting the PA guidelines ( $\geq 60$ MVPA-mins/day) is low, declines with age, and is stable from 2002-2014.                                                          | ▼ |
| Takamiya et al, 2019 | Japan                  | 286,704 | Adolescent ( $>15$ , 1995–2011) and adult ( $>19$ , 2012–2016) | C-S | Survey        | 1995–2016 | PA declined between 1995 to 2008, but the decline has since become unclear.                                                                                                                               | ▼ |

11 Abbreviations: C-S, cross-sectional study; LPA, light physical activity; LTPA, leisure-time physical activity; MET, metabolic equivalent of task;

12 MVPA, moderate-to-vigorous physical activity; PA, physical activity; PAG, physical activity guidelines for Americans.

13
