# Supplementary material for: National Trends in Physical Activity Among Adults in South Korea Before and During the COVID-19 Pandemic, 2009-2021
Source: PubMed Central journal article supplement (PMC10242425; doi:10.1001/jamanetworkopen.2023.16930), 2023-06-05
Supplement: jamanetwopen-e2316930-s002.pdf [file jamanetwopen-e2316930-s002.pdf]

## Data Sharing Statement

Park. National Trends in Physical Activity Among Adults in South Korea Before and During the COVID-19 Pandemic, 2009-2021. *JAMA Netw Open*. Published online June 5, 2023. doi:10.1001/jamanetworkopen.2023.16930

## Data

**Data available:** Data are available on reasonable request. Study protocol, statistical code: available from DKY (email: yonkkang@gmail.com). Data set: available from the Korea Disease Control Agency (KDCA) through a data use agreement.
